# Supplementary material
Source: publisher site journal article supplement (https://www.dovepress.com/article/548582)
Supplement: Supplementary file 1 [file 548582-additional-file_1.docx]

**Table S1.** Spearman correlation analyses among serum inflammatory biomarkers.

|  | PCT | ESR | hsCRP | FBG | D-dimer | IL-6 | IL-8 | IL-10 | TNF-α |
| --- | --- | --- | --- | --- | --- | --- | --- | --- | --- |
| PCT | 1 |  |  |  |  |  |  |  |  |
| ESR | 0.004 | 1 |  |  |  |  |  |  |  |
| hsCRP | **0.369** | **0.289** | 1 |  |  |  |  |  |  |
| FBG | **-0.104** | **0.474** | **0.189** | 1 |  |  |  |  |  |
| D-dimer | 0.076 | 0.013 | 0.011 | 0.091 | 1 |  |  |  |  |
| IL-6 | **0.339** | -0.082 | **0.479** | **-0.254** | **-0.184** | 1 |  |  |  |
| IL-8 | 0.078 | -0.042 | 0.083 | -0.087 | 0.055 | **0.277** | 1 |  |  |
| IL-10 | **0.365** | 0.001 | **0.178** | **-0.2** | -0.033 | **0.448** | **0.252** | 1 |  |
| TNF-α | **0.321** | 0.087 | **0.232** | 0.066 | **0.266** | **0.173** | **0.368** | **0.342** | 1 |

Note: PCT: procalcitonin; ESR: erythrocyte sedimentation rate; hsCRP: hypersensitive C-reactive protein; FBG: fibrinogen; IL: interleukin; TNF-α: tumor necrosis factor-α; C: complement; Ig: immunoglobulin. Bold text means have statistical significance. * P<0.05

**Table S2.** The detailed results of interaction analysis.

| X | Y | Low Inflammatory State | | | | High Inflammatory State | | | |
| --- | --- | --- | --- | --- | --- | --- | --- | --- | --- |
| RR | Low | Up | P-value | RR | Low | Up | P-value |
| B.CD19 | Mortality | 0.999 | 0.996 | 1.004 | 0.970 | 0.996 | 0.988 | 1.004 | 0.284 |
| T.CD3 | Mortality | 0.999 | 0.998 | 1.001 | 0.253 | 0.999 | 0.997 | 1.002 | 0.298 |
| CD8+DR+T | Mortality | 0.999 | 0.995 | 1.003 | 0.856 | 0.996 | 0.991 | 1.002 | 0.160 |

Note: The model adjusts for age, gender and APACHE II score.
